# Supplementary material for: Network Pharmacology-Based Strategy for Elucidating the Molecular Basis Forthe Pharmacologic Effects of Licorice (Glycyrrhiza spp.)
Source: Front Pharmacol. 2021 Apr 28;12:590477. doi: 10.3389/fphar.2021.590477 (PMC8114075; doi:10.3389/fphar.2021.590477)
Supplement: Supplementary file 3 [file Table4.XLS]

## Sheet: Table S4
Bioavailability of Flavonoids
Number	Component name english	OB																											DL	QED	Lipinski	Bioavailability Score
1	2,4,4'-trihydroxychalcone	0.8532	0.15	0.8532	0.15	0.8532	0.15	0.8532	0.15	0.8532	0.15	0.8532	0.15	0.8532	0.15	0.8532	0.15	0.8532	0.15	0.8532	0.15	0.8532	0.15	0.8532	0.15	0.8532	0.15	0.8532	0.15
2	formononetin	0.6967	0.21	0.6967	0.21	0.6967	0.21	0.6967	0.21	0.6967	0.21	0.6967	0.21	0.6967	0.21	0.6967	0.21	0.6967	0.21	0.6967	0.21	0.6967	0.21	0.6967	0.21	0.6967	0.21	0.6967	0.21
3	glycyroside	0.3725	0.79	0.3725	0.79	0.3725	0.79	0.3725	0.79	0.3725	0.79	0.3725	0.79	0.3725	0.79	0.3725	0.79	0.3725	0.79	0.3725	0.79	0.3725	0.79	0.3725	0.79	0.3725	0.79	0.3725	0.79
4	isoliquiritin	0.0861	0.6	0.0861	0.6	0.0861	0.6	0.0861	0.6	0.0861	0.6	0.0861	0.6	0.0861	0.6	0.0861	0.6	0.0861	0.6	0.0861	0.6	0.0861	0.6	0.0861	0.6	0.0861	0.6	0.0861	0.6
5	isoononin	0.0829	0.79	0.0829	0.79	0.0829	0.79	0.0829	0.79	0.0829	0.79	0.0829	0.79	0.0829	0.79	0.0829	0.79	0.0829	0.79	0.0829	0.79	0.0829	0.79	0.0829	0.79	0.0829	0.79	0.0829	0.79
6	isoschaftoside	0.1738	0.83	0.1738	0.83	0.1738	0.83	0.1738	0.83	0.1738	0.83	0.1738	0.83	0.1738	0.83	0.1738	0.83	0.1738	0.83	0.1738	0.83	0.1738	0.83	0.1738	0.83	0.1738	0.83	0.1738	0.83
7	licobichalcone	/																											/	0.131
8	licoricone	0.6358																											0.47
9	liquiritigenin	0.3276	0.18	0.3276	0.18	0.3276	0.18	0.3276	0.18	0.3276	0.18	0.3276	0.18	0.3276	0.18	0.3276	0.18	0.3276	0.18	0.3276	0.18	0.3276	0.18	0.3276	0.18	0.3276	0.18	0.3276	0.18
10	liquiritigenin-7,4'-diglucoside	/																											/	0.192
11	liquiritigenin-7-o-beta-d-(3-o-acetyl)-apiofuranosyl-4'-o-beta-d-glucopyranoside																													0.228
12	liquiritin	0.6569	0.74	0.6569	0.74	0.6569	0.74	0.6569	0.74	0.6569	0.74	0.6569	0.74	0.6569	0.74	0.6569	0.74	0.6569	0.74	0.6569	0.74	0.6569	0.74	0.6569	0.74	0.6569	0.74	0.6569	0.74
13	neoisoliquiritin	0.2118	0.58	0.2118	0.58	0.2118	0.58	0.2118	0.58	0.2118	0.58	0.2118	0.58	0.2118	0.58	0.2118	0.58	0.2118	0.58	0.2118	0.58	0.2118	0.58	0.2118	0.58	0.2118	0.58	0.2118	0.58
14	ononin	0.1152	0.78	0.1152	0.78	0.1152	0.78	0.1152	0.78	0.1152	0.78	0.1152	0.78	0.1152	0.78	0.1152	0.78	0.1152	0.78	0.1152	0.78	0.1152	0.78	0.1152	0.78	0.1152	0.78	0.1152	0.78
15	ononitol	/																											/	/	Yes; 0 violation	0.55
16	schaftoside	0.2296	0.78	0.2296	0.78	0.2296	0.78	0.2296	0.78	0.2296	0.78	0.2296	0.78	0.2296	0.78	0.2296	0.78	0.2296	0.78	0.2296	0.78	0.2296	0.78	0.2296	0.78	0.2296	0.78	0.2296	0.78
17	4',7-dihydroxyflavone	0.1918	0.18	0.1918	0.18	0.1918	0.18	0.1918	0.18	0.1918	0.18	0.1918	0.18	0.1918	0.18	0.1918	0.18	0.1918	0.18	0.1918	0.18	0.1918	0.18	0.1918	0.18	0.1918	0.18	0.1918	0.18
18	licochalcone b	0.7676	0.19	0.7676	0.19	0.7676	0.19	0.7676	0.19	0.7676	0.19	0.7676	0.19	0.7676	0.19	0.7676	0.19	0.7676	0.19	0.7676	0.19	0.7676	0.19	0.7676	0.19	0.7676	0.19	0.7676	0.19
19	licochalcone c	0.0444																											0.29
20	licochalcone d	0.0101																											0.34
21	licochalcone e	/																											/	/	Yes; 0 violation	0.55
22	echinatin	0.6658	0.17	0.6658	0.17	0.6658	0.17	0.6658	0.17	0.6658	0.17	0.6658	0.17	0.6658	0.17	0.6658	0.17	0.6658	0.17	0.6658	0.17	0.6658	0.17	0.6658	0.17	0.6658	0.17	0.6658	0.17
23	semilicoisoflavone b	0.4878																											0.55
24	7-acetoxy-2-methyl isoflavone	0.3892																											0.26
25	7-hydroxy-2-methyl isoflavone	0.258																											0.18
26	7-methoxy-2-methyl isoflavone	/																											/	0.836
27	licoagrochalcone c	/																											/	0.418
28	licoagrochalcone d	/																											/	0.67
29	licoagrodin	/																											/	/	No; 2 violations: MW>500, MLOGP>4.15	0.17
30	violanthin	0.1538	0.81	0.1538	0.81	0.1538	0.81	0.1538	0.81	0.1538	0.81	0.1538	0.81	0.1538	0.81	0.1538	0.81	0.1538	0.81	0.1538	0.81	0.1538	0.81	0.1538	0.81	0.1538	0.81	0.1538	0.81
31	7-methoxy-4'-hydroxyflavone	/																											/	/	Yes; 0 violation	0.55
32	7-methoxy-4'-hydroxyflavonol	/																											/	/	Yes; 0 violation	0.55
33	Vicenin-2	0.4584	0.21	0.4584	0.21	0.4584	0.21	0.4584	0.21	0.4584	0.21	0.4584	0.21	0.4584	0.21	0.4584	0.21	0.4584	0.21	0.4584	0.21	0.4584	0.21	0.4584	0.21	0.4584	0.21	0.4584	0.21
34	Kumatakenin	0.5083	0.29	0.5083	0.29	0.5083	0.29	0.5083	0.29	0.5083	0.29	0.5083	0.29	0.5083	0.29	0.5083	0.29	0.5083	0.29	0.5083	0.29	0.5083	0.29	0.5083	0.29	0.5083	0.29	0.5083	0.29
35	kaempferol	0.4188	0.24	0.4188	0.24	0.4188	0.24	0.4188	0.24	0.4188	0.24	0.4188	0.24	0.4188	0.24	0.4188	0.24	0.4188	0.24	0.4188	0.24	0.4188	0.24	0.4188	0.24	0.4188	0.24	0.4188	0.24
36	Naringetol	0.5929	0.21	0.5929	0.21	0.5929	0.21	0.5929	0.21	0.5929	0.21	0.5929	0.21	0.5929	0.21	0.5929	0.21	0.5929	0.21	0.5929	0.21	0.5929	0.21	0.5929	0.21	0.5929	0.21	0.5929	0.21
37	glyinflanin A	0.0106																											0.48
38	naringin	0.2438	0.55	0.2438	0.55	0.2438	0.55	0.2438	0.55	0.2438	0.55	0.2438	0.55	0.2438	0.55	0.2438	0.55	0.2438	0.55	0.2438	0.55	0.2438	0.55	0.2438	0.55	0.2438	0.55	0.2438	0.55
39	Kanzonol C	/																											/	/	Yes; 0 violation	0.55
40	Morachalcone A	/																											/	/	Yes; 0 violation Yes; 0 violation	0.55
41	(-)-Medicocarpin	0.4099	0.95	0.4099	0.95	0.4099	0.95	0.4099	0.95	0.4099	0.95	0.4099	0.95	0.4099	0.95	0.4099	0.95	0.4099	0.95	0.4099	0.95	0.4099	0.95	0.4099	0.95	0.4099	0.95	0.4099	0.95
42	vitexin	0.5218	0.21	0.5218	0.21	0.5218	0.21	0.5218	0.21	0.5218	0.21	0.5218	0.21	0.5218	0.21	0.5218	0.21	0.5218	0.21	0.5218	0.21	0.5218	0.21	0.5218	0.21	0.5218	0.21	0.5218	0.21
43	Choerospondin	0.1403	0.78	0.1403	0.78	0.1403	0.78	0.1403	0.78	0.1403	0.78	0.1403	0.78	0.1403	0.78	0.1403	0.78	0.1403	0.78	0.1403	0.78	0.1403	0.78	0.1403	0.78	0.1403	0.78	0.1403	0.78
44	Licraside	/																											/	/	No; 3 violations: MW>500, NorO>10, NHorOH>5	0.17
45	Liquiritin apioside	0.2923	0.82	0.2923	0.82	0.2923	0.82	0.2923	0.82	0.2923	0.82	0.2923	0.82	0.2923	0.82	0.2923	0.82	0.2923	0.82	0.2923	0.82	0.2923	0.82	0.2923	0.82	0.2923	0.82	0.2923	0.82
46	Isoformononetin	0.3837	0.21	0.3837	0.21	0.3837	0.21	0.3837	0.21	0.3837	0.21	0.3837	0.21	0.3837	0.21	0.3837	0.21	0.3837	0.21	0.3837	0.21	0.3837	0.21	0.3837	0.21	0.3837	0.21	0.3837	0.21
47	4,2',4',alpha-Tetrahydroxydihydrochalcone	0.0245																											0.16
48	6″-O-acetylliquiritin	0.0626																											0.82
49	7-Hydroxy-2-methylisoflavone	0.258																											0.18
50	Vestitol	0.7466	0.21	0.7466	0.21	0.7466	0.21	0.7466	0.21	0.7466	0.21	0.7466	0.21	0.7466	0.21	0.7466	0.21	0.7466	0.21	0.7466	0.21	0.7466	0.21	0.7466	0.21	0.7466	0.21	0.7466	0.21
51	Gancaonin G	0.6044																											0.39
52	Isoliquiritin apioside
Bioavailability of Coumarins
Number	Component name english	OB																											DL	QED	Lipinski	Bioavailability Score
1	gancaonin f	/																											/	/	Yes; 0 violation	0.55
2	isotrifoliol	31.94																											0.42
3	licofuranocoumarin	/																											/	0.552
4	umbelliferone	/																											/	0.551
5	isoglycycoumarin	22.09																											0.6
6	liqcoumarin	/																											/	/	Yes; 0 violation	0.55
7	7,2',4'-trihydroxy－5-methoxy-3－arylcoumarin	83.71																											0.27
Bioavailability of Triterpenoids
Number	Component name english	OB																											DL	QED	Lipinski	Bioavailability Score
1	18alpha-glycyrrhetinic acid	0.1741	0.74	0.1741	0.74	0.1741	0.74	0.1741	0.74	0.1741	0.74	0.1741	0.74	0.1741	0.74	0.1741	0.74	0.1741	0.74	0.1741	0.74	0.1741	0.74	0.1741	0.74	0.1741	0.74	0.1741	0.74
2	18beta-glycyrrhetinic acid	0.2205	0.74	0.2205	0.74	0.2205	0.74	0.2205	0.74	0.2205	0.74	0.2205	0.74	0.2205	0.74	0.2205	0.74	0.2205	0.74	0.2205	0.74	0.2205	0.74	0.2205	0.74	0.2205	0.74	0.2205	0.74
3	dibutyl uralsaponin a ester	/																											/	0.067
4	glabrolide	0.1746	0.61	0.1746	0.61	0.1746	0.61	0.1746	0.61	0.1746	0.61	0.1746	0.61	0.1746	0.61	0.1746	0.61	0.1746	0.61	0.1746	0.61	0.1746	0.61	0.1746	0.61	0.1746	0.61	0.1746	0.61
5	glycyrrhetol	0.1466	0.75	0.1466	0.75	0.1466	0.75	0.1466	0.75	0.1466	0.75	0.1466	0.75	0.1466	0.75	0.1466	0.75	0.1466	0.75	0.1466	0.75	0.1466	0.75	0.1466	0.75	0.1466	0.75	0.1466	0.75
6	glycyrrhizic acid	0.1962	0.11	0.1962	0.11	0.1962	0.11	0.1962	0.11	0.1962	0.11	0.1962	0.11	0.1962	0.11	0.1962	0.11	0.1962	0.11	0.1962	0.11	0.1962	0.11	0.1962	0.11	0.1962	0.11	0.1962	0.11
7	glyeurysaponin	/																											/	/	No; 3 violations: MW>500, NorO>10, NHorOH>5	0.11
8	glyuranolide	/																											/	0.548
9	glyyunnanprosapogenin d	/																											/	/	No; 3 violations: MW>500, NorO>10, NHorOH>5	0.11
10	licoricesaponin a3	/																											/	0.081
11	licoricesaponin b2	0.5855																											0.11
12	licoricesaponin c2	0.5966																											0.11
13	licoricesaponin d3	/																											/	0.06
14	licoricesaponin e2	/																											/	0.115
15	licoricesaponin f3	0.1768																											0.03
16	licoricesaponin g2	0.0639																											0.11
17	licoricesaponin j2	0.0625																											0.11
18	licoricesaponin k2	0.0782																											0.11
19	licoricesaponine h2	0.4437																											0.11
20	liquoric acid	0.2544	0.55	0.2544	0.55	0.2544	0.55	0.2544	0.55	0.2544	0.55	0.2544	0.55	0.2544	0.55	0.2544	0.55	0.2544	0.55	0.2544	0.55	0.2544	0.55	0.2544	0.55	0.2544	0.55	0.2544	0.55
21	methyl 18α-hydroxyglycyrrhetate	/																											/	0.525
22	methyl-n-butyl-uralsaponin a esters	/																											/	0.091
23	methyl glycyrrhetate	/																											/	0.497
24	uralsaponin a	/																											/	0.135
25	uralsaponin b	0.0792	0.11	0.0792	0.11	0.0792	0.11	0.0792	0.11	0.0792	0.11	0.0792	0.11	0.0792	0.11	0.0792	0.11	0.0792	0.11	0.0792	0.11	0.0792	0.11	0.0792	0.11	0.0792	0.11	0.0792	0.11
26	11-deoxoglycyrrhetinic acid	0.1621	0.76	0.1621	0.76	0.1621	0.76	0.1621	0.76	0.1621	0.76	0.1621	0.76	0.1621	0.76	0.1621	0.76	0.1621	0.76	0.1621	0.76	0.1621	0.76	0.1621	0.76	0.1621	0.76	0.1621	0.76
27	apioglycyrrhizin	0.2373	0.74	0.2373	0.74	0.2373	0.74	0.2373	0.74	0.2373	0.74	0.2373	0.74	0.2373	0.74	0.2373	0.74	0.2373	0.74	0.2373	0.74	0.2373	0.74	0.2373	0.74	0.2373	0.74	0.2373	0.74
28	araboglycyrrhizin	0.1773	0.14	0.1773	0.14	0.1773	0.14	0.1773	0.14	0.1773	0.14	0.1773	0.14	0.1773	0.14	0.1773	0.14	0.1773	0.14	0.1773	0.14	0.1773	0.14	0.1773	0.14	0.1773	0.14	0.1773	0.14
29	18α-hydroxy glycyrrheticacid	0.4116	0.71	0.4116	0.71	0.4116	0.71	0.4116	0.71	0.4116	0.71	0.4116	0.71	0.4116	0.71	0.4116	0.71	0.4116	0.71	0.4116	0.71	0.4116	0.71	0.4116	0.71	0.4116	0.71	0.4116	0.71
30	21α-hydroxyisoglabrolide	/																											/	/	Yes; 0 violation	0.55
31	24-hydroxy-11-deoxoglycyrrheticacid	0.1757	0.76	0.1757	0.76	0.1757	0.76	0.1757	0.76	0.1757	0.76	0.1757	0.76	0.1757	0.76	0.1757	0.76	0.1757	0.76	0.1757	0.76	0.1757	0.76	0.1757	0.76	0.1757	0.76	0.1757	0.76
32	24-hydroxyglycyrrheticacid	0.2417	0.72	0.2417	0.72	0.2417	0.72	0.2417	0.72	0.2417	0.72	0.2417	0.72	0.2417	0.72	0.2417	0.72	0.2417	0.72	0.2417	0.72	0.2417	0.72	0.2417	0.72	0.2417	0.72	0.2417	0.72
33	isoglabrolide	0.1477	0.62	0.1477	0.62	0.1477	0.62	0.1477	0.62	0.1477	0.62	0.1477	0.62	0.1477	0.62	0.1477	0.62	0.1477	0.62	0.1477	0.62	0.1477	0.62	0.1477	0.62	0.1477	0.62	0.1477	0.62
34	liquiriticacid	/																											/	/	Yes; 1 violation: MLOGP>4.15	0.56
35	glycyrrhetic acid acetate	/																											/	/	No; 2 violations: MW>500, MLOGP>4.15	0.56
36	glyyunnansapogenin a	/																											/	/	Yes; 0 violation	0.56
37	glyyunnansapogenin b	/																											/	/	Yes; 0 violation	0.56
38	glyyunnansapogenin f	/																											/	/	Yes; 0 violation	0.56
39	yunganoside a1	/																											/	/	No; 3 violations: MW>500, NorO>10, NHorOH>5	0.11
40	yunganoside b1	/																											/	/	No; 3 violations: MW>500, NorO>10, NHorOH>5	0.11
41	yunganoside c1	/																											/	/	No; 3 violations: MW>500, NorO>10, NHorOH>5	0.11
42	yunganoside d1	/																											/	/	No; 3 violations: MW>500, NorO>10, NHorOH>5	0.11
43	yunganoside e2	/																											/	/	No; 3 violations: MW>500, NorO>10, NHorOH>5	0.11
44	yunganoside f2	/																											/	/	No; 3 violations: MW>500, NorO>10, NHorOH>5	0.11
45	oleanolic acid	0.2902	0.76	0.2902	0.76	0.2902	0.76	0.2902	0.76	0.2902	0.76	0.2902	0.76	0.2902	0.76	0.2902	0.76	0.2902	0.76	0.2902	0.76	0.2902	0.76	0.2902	0.76	0.2902	0.76	0.2902	0.76
46	22β-acetylglabricacid	0.1776	0.64	0.1776	0.64	0.1776	0.64	0.1776	0.64	0.1776	0.64	0.1776	0.64	0.1776	0.64	0.1776	0.64	0.1776	0.64	0.1776	0.64	0.1776	0.64	0.1776	0.64	0.1776	0.64	0.1776	0.64
47	Ursolic acid	0.1677	0.75	0.1677	0.75	0.1677	0.75	0.1677	0.75	0.1677	0.75	0.1677	0.75	0.1677	0.75	0.1677	0.75	0.1677	0.75	0.1677	0.75	0.1677	0.75	0.1677	0.75	0.1677	0.75	0.1677	0.75
