# Supplementary material for: Network Pharmacology-Based Strategy for Elucidating the Molecular Basis Forthe Pharmacologic Effects of Licorice (Glycyrrhiza spp.)
Source: Front Pharmacol. 2021 Apr 28;12:590477. doi: 10.3389/fphar.2021.590477 (PMC8114075; doi:10.3389/fphar.2021.590477)
Supplement: Supplementary file 5 [file Table5.XLSX]

## Sheet: Sheet1
N0.	tR(min)	Putative compound	CAS No.	Molecular formula	Measured mass(m/z)	ppm	MS2 fragments	Structure types
1	4.44	Schaftoside	51938-32-0	C26H28O14	565.152	-7.1	547.1431/257.0822	Flavonoid
2	5.14	Neoliquiritin	5088-75-5	C21H22O9	419.137	5.5	257.0822/239.0707/137.0258	Flavonoid
3	5.18	liquiritin apioside	74639-14-8	C26H30O13	551.172	-7.8	257.0822/239.0707/137.0258	Flavonoid
4	5.2	Calycosin 7-O-β-D-Glucopyranoside	20633-67-4	C22H22O10	447.132	6.7	285.0789/270.0457/257.0822/258.0837	Flavonoid
5	5.31	Liquiritin	551-15-5	C21H22O9	419.137	5.5	257.0822/239.0707/137.0258	Flavonoid
6	7.8	isoliquiritin apioside	120926-46-7	C26H30O13	551.172	-7.8	419.1365/257.0822/239.0707/137.0258	Flavonoid
7	8.23	Isoliquiritin	5041-81-6	C21H22O9	419.137	5.5	257.0822/137.0258	Flavonoid
8	8.29	Ononin	486-62-4	C22H22O9	431.139	11.1	269.0856/237.0575	Flavonoid
9	8.72	Neoisoliquiritin	59122-93-9	C21H22O9	419.137	5.5	257.0822/239.0707/147.0459/	Flavonoid
10	8.89	Licochalcone B	58749-23-8	C16H14O5	287.094	6.9	257.0822/255.0641/193.0496/137.0258	Flavonoid
11	9.02	Liquiritigenin	578-86-9	C15H12O4	257.082	3.1	165.0715/137.0258	Flavonoid
12	10.19	Calycosin	20575-57-9	C16H12O5	285.079	9.1	270.0529/257.0752	Flavonoid
13	11.97	Naringenin	480-41-1	C15H12O5	273.08	15.01	257.0822/153.0214	Flavonoid
14	12.55	Echinatin	34221-41-5	C16H14O4	271.101	14.3	229.0900/177.0553/121.0280	Flavonoid
15	12.93	Kaempferol	520-18-3	C15H10O6	287.057	4.5	257.0472/153.0214/241.0571/121.0328/258.0486	Flavonoid
16	15.18	Isoliquiritigenin	961-29-5	C15H12O4	257.082	3.1	137.026	Flavonoid
17	15.52	Formononetin	485-72-3	C16H12O4	269.086	15.6	253.0540/237.0575/213.0919/137.0258	Flavonoid
18	17.5	Glycyrrhizic acid monoammonium salt	53956-04-0	C42H62O16·H3N	823.417	6.8	471.3504/453.3451/407.3299	Triterpenoid
19	18.25	Licoflavone A	61153-77-3	C20H18O4	323.132	11.7	268.0701/267.0637/239.0707/197.0597/165.0715	Flavonoid
20	19.19	Glycycoumarin	94805-82-0	C21H20O6	369.139	15.4	313.0691/285.0789/270.0529/271.0578	Coumarin
21	19.31	Kumatakenin	3301-49-3	C17H14O6	315.088	2.2	300.0656/301.0718/299.0536/271.0649/257.0472/285.0789	Flavonoid
22	19.52	Licoflavone C	72357-31-4	C20H18O5	339.124	1.2	255.0641/265.0493/283.0637/295.0599/	Flavonoid
23	20.35	licoisoflavone A	66056-19-7	C20H18O6	355.115	-10.1	299.0536/243.0681/217.0468/300.0581	Flavonoid
24	20.69	licoricone	51847-92-8	C22H22O6	383.146	-10.1	327.0898/299.0913/329.0896/267.0637/241.0517/295.0599/283.0637/328.0929/213.0537	Flavonoid
25	20.85	Licochalcone A	58749-22-7	C21H22O4	339.164	12.3	307.1368/283.1004/245.1203/189.0567/297.0797/177.0553/147.0459	Flavonoid
26	21.29	Glycyrol	23013-84-5	C21H18O6	367.122	9.5	311.0571/309.0363/296.0352/281.0483/268.0344/253.0540/	Coumarin
27	22.29	licoflavonol	60197-60-6	C20H18O6	355.123	12.9	299.0536/271.0578/121.0280	Flavonoid
28	22.66	licoisoflavone B	66056-30-2	C20H16O6	353.103	0.6	311.0571/299.0536/153.0214	Flavonoid
29	26.85	18α-Glycyrrhetinic acid	1449-05-4	C30H46O4	471.35	6.3	453.3358/435.3261/407.3299	Triterpenoid
30	27.02	18β-Glycyrrhetinic acid	471-53-4	C30H46O4	471.35	6.3	453.3358/435.3261/407.3299	Triterpenoid
Note: all compounds has been compared with reference compound.
